# Supplementary material for: Long-term safety and efficacy of open-label nabilone on sleep and pain in Parkinson´s Disease
Source: Springer Nature journal article supplement (doi:10.1038/s41531-024-00665-7), 2024-03-15
Supplement: MOESM2 [file 41531_2024_665_MOESM2_ESM.pdf]

## Supplementary Files

**Supplementary Table 1: Safety Analysis of the titration phase: Full list of AEs and SAEs**

| Titration phase                                                                                                                                                                                                                                                                                                                                                                                                                                                                                                                                                         |
|-------------------------------------------------------------------------------------------------------------------------------------------------------------------------------------------------------------------------------------------------------------------------------------------------------------------------------------------------------------------------------------------------------------------------------------------------------------------------------------------------------------------------------------------------------------------------|
| <b>AEs (n=13)</b>                                                                                                                                                                                                                                                                                                                                                                                                                                                                                                                                                       |
| <p><b>Mild</b></p> <p>Vertigo (n=2): possibly related (n=1), probably related (n=1)</p> <p>Pain (n=2): possibly related (n=1, in both legs), not related (n=1, diffuse)</p> <p>Headache (n=1): possibly related</p> <p>Inner tension (n=1): possibly related</p> <p>Sleep disturbances (maintenance of sleep, n=1): not related</p> <p>Upper respiratory tract infection (n=1): not related</p> <p>Dry skin (n=1): not related</p> <p>Fall (n=1): not related</p> <p><b>Moderate</b></p> <p>Frontal sinusitis (n=1): not related</p> <p>Insomnia (n=1): not related</p> |
| <b>SAEs (n=2)</b>                                                                                                                                                                                                                                                                                                                                                                                                                                                                                                                                                       |
| <p><b>Moderate:</b></p> <p>Medication-induced Nausea (n=1): not related, hospitalization</p> <p>Medication-induced Emesis (n=1): not related, hospitalization</p>                                                                                                                                                                                                                                                                                                                                                                                                       |

Abbreviations: n, number; AE, adverse event; SAE, serious adverse event.

**Supplementary Table 2: Safety Analysis of the open-label phase: Full list of AEs and SAEs**

| <b>Open-label phase <sup>a</sup></b>                                                                                                                                                                                                                                                                                                                                                                                                                                                                                                                                                                                                                                                                                                                                                                                                                                                                                                                                                                                                                                                                                                                                                                                                                                                                                                                                                                                                                                                                                                                                                                                                                                                                                                                                                                                                                                                                                                                                                                                                                                                                                                                                                                                                                                                                                                                                            |
|---------------------------------------------------------------------------------------------------------------------------------------------------------------------------------------------------------------------------------------------------------------------------------------------------------------------------------------------------------------------------------------------------------------------------------------------------------------------------------------------------------------------------------------------------------------------------------------------------------------------------------------------------------------------------------------------------------------------------------------------------------------------------------------------------------------------------------------------------------------------------------------------------------------------------------------------------------------------------------------------------------------------------------------------------------------------------------------------------------------------------------------------------------------------------------------------------------------------------------------------------------------------------------------------------------------------------------------------------------------------------------------------------------------------------------------------------------------------------------------------------------------------------------------------------------------------------------------------------------------------------------------------------------------------------------------------------------------------------------------------------------------------------------------------------------------------------------------------------------------------------------------------------------------------------------------------------------------------------------------------------------------------------------------------------------------------------------------------------------------------------------------------------------------------------------------------------------------------------------------------------------------------------------------------------------------------------------------------------------------------------------|
| <b>AEs (n=39)</b>                                                                                                                                                                                                                                                                                                                                                                                                                                                                                                                                                                                                                                                                                                                                                                                                                                                                                                                                                                                                                                                                                                                                                                                                                                                                                                                                                                                                                                                                                                                                                                                                                                                                                                                                                                                                                                                                                                                                                                                                                                                                                                                                                                                                                                                                                                                                                               |
| <p><b>Mild</b></p> <p>Concentration difficulties (n=2): possibly related (n=1), not related (n=1)<br/>                     Intermittent falls (n=2): not related<br/>                     Upper respiratory tract infection (n=2): not related (viral n=1, bacterial n=1)<br/>                     Urinary tract infection (n=2): not related<br/>                     Vertigo (n=1): possibly related<br/>                     Muscle cramps (n=1): not related<br/>                     Hypercholesterinaemia (n=1): not related<br/>                     Osteoporosis (n=1): not related<br/>                     Haematoma right ankle with oedema (n=1): not related<br/>                     Vitamin B12 deficiency (n=1): not related<br/>                     Numbness of the left side of the face (n=1): not related<br/>                     Bursitis right elbow (n=1): not related<br/>                     Skin infection leg (n=1): not related<br/>                     Eczema (n=1): not related</p> <p><b>Moderate</b></p> <p>Insomnia (n=2): not related (n=1 leading to discontinuation)<br/>                     Lumbar pain (n=2): not related<br/>                     Arthrosis (n=2): not related (polyarthrosis of both hands n=1, gonarthrosis n=1)<br/>                     Respiratory tract infection (n=2): not related (upper respiratory tract, bacterial n=1, bronchitis n=1)<br/>                     Concentration difficulties (n=1): possibly related<br/>                     Transient dysarthria (n=1): possibly related<br/>                     Transient numbness of the face (n=1): possibly related<br/>                     Intermittent falls (n=1): not related<br/>                     Chronic widespread pain of the joints and muscles (n=1): not related<br/>                     Chronic diarrhoea (n=1): not related<br/>                     Autonomous reaction (n=1): not related<br/>                     Nausea (n=1): not related<br/>                     Vertebral fracture (thoracic vertebral body 7) associated with pain (n=1): not related<br/>                     Osteopenia (n=1): not related<br/>                     Worsening of PD (n=1): not related<br/>                     Lipoma left arm and chest (n=1): not related<br/>                     Restless legs syndrome (n=1): not related</p> |
| <b>SAEs (n=2)</b>                                                                                                                                                                                                                                                                                                                                                                                                                                                                                                                                                                                                                                                                                                                                                                                                                                                                                                                                                                                                                                                                                                                                                                                                                                                                                                                                                                                                                                                                                                                                                                                                                                                                                                                                                                                                                                                                                                                                                                                                                                                                                                                                                                                                                                                                                                                                                               |
| <p><b>Moderate</b></p> <p>Worsening of PD (n=1): not related</p> <p><b>Severe, Life-threatening</b></p> <p>Adenocarcinoma of the rectum (n=1): not related</p>                                                                                                                                                                                                                                                                                                                                                                                                                                                                                                                                                                                                                                                                                                                                                                                                                                                                                                                                                                                                                                                                                                                                                                                                                                                                                                                                                                                                                                                                                                                                                                                                                                                                                                                                                                                                                                                                                                                                                                                                                                                                                                                                                                                                                  |
| <b>Safety Follow-Up phase</b>                                                                                                                                                                                                                                                                                                                                                                                                                                                                                                                                                                                                                                                                                                                                                                                                                                                                                                                                                                                                                                                                                                                                                                                                                                                                                                                                                                                                                                                                                                                                                                                                                                                                                                                                                                                                                                                                                                                                                                                                                                                                                                                                                                                                                                                                                                                                                   |
| <b>AEs (n=7)</b>                                                                                                                                                                                                                                                                                                                                                                                                                                                                                                                                                                                                                                                                                                                                                                                                                                                                                                                                                                                                                                                                                                                                                                                                                                                                                                                                                                                                                                                                                                                                                                                                                                                                                                                                                                                                                                                                                                                                                                                                                                                                                                                                                                                                                                                                                                                                                                |
| <p><b>Mild</b></p> <p>Restless legs syndrome (n=1): not related<br/>                     Intermittent panic attacks (n=1): not related</p> <p><b>Moderate</b></p> <p>Pain (n=3): not related (shoulder and knee n=1, diffuse neuropathic pain n=1, lumbar pain n=1)<br/>                     Suspected borreliosis after bite of a tick (n=1): not related<br/>                     Insomnia (n=1): not related</p>                                                                                                                                                                                                                                                                                                                                                                                                                                                                                                                                                                                                                                                                                                                                                                                                                                                                                                                                                                                                                                                                                                                                                                                                                                                                                                                                                                                                                                                                                                                                                                                                                                                                                                                                                                                                                                                                                                                                                             |
| <b>SAEs (n=1)</b>                                                                                                                                                                                                                                                                                                                                                                                                                                                                                                                                                                                                                                                                                                                                                                                                                                                                                                                                                                                                                                                                                                                                                                                                                                                                                                                                                                                                                                                                                                                                                                                                                                                                                                                                                                                                                                                                                                                                                                                                                                                                                                                                                                                                                                                                                                                                                               |
| <p><b>Severe:</b></p> <p>Multiple herniated discs lumbar, degenerative changes in lumbar spine (n=1): not related</p>                                                                                                                                                                                                                                                                                                                                                                                                                                                                                                                                                                                                                                                                                                                                                                                                                                                                                                                                                                                                                                                                                                                                                                                                                                                                                                                                                                                                                                                                                                                                                                                                                                                                                                                                                                                                                                                                                                                                                                                                                                                                                                                                                                                                                                                           |

<sup>a</sup> Adverse events that started in the titration phase and continued in the open-label phase were noted here. Abbreviations: OL, open-label; n, number; AE, adverse event; SAE, serious adverse event; PD, Parkinson's Disease.

**Supplementary Table 3: Change in endpoint scores during open-label administration of nabilone, patients n= 19**

|                                         | V 1<br>n=21                                | V 3<br>n=19                                | Mean change<br>between V 1 and V 3                     | p-value | Effect size |
|-----------------------------------------|--------------------------------------------|--------------------------------------------|--------------------------------------------------------|---------|-------------|
| <b>MDS-UPDRS-I</b>                      | 8.76 ±6.20<br>(8.00)<br>(4.00 – 13.00)     | 9.47 ±5.90<br>(8.00)<br>(4.00 – 14.00)     | 1.05 ±5.20 (-1.45;<br>3.56)<br>(0.00, -1.00 – 5.00)    | 0.330   | 0.20        |
| <b>MDS-UPDRS-II</b>                     | 11.24 ±7.49<br>(11.00)<br>(5.50 – 15.50)   | 11.11 ±6.82<br>(8.00)<br>(6.00 – 16.00)    | 0.58 ±3.49 (-1.10;<br>2.26)<br>(1.00, -1.00 – 3.00)    | 0.195   | -0.17       |
| <b>MDS-UPDRS-III</b>                    | 27.86 ±11.97<br>(29.00)<br>(18.00 – 37.50) | 29.37 ±10.10<br>(28.00) (21.00 –<br>38.00) | 1.89 ±6.88 (-1.42;<br>5.21)<br>(1.00, -1.00 – 5.00)    | 0.092   | -0.28       |
| <b>MDS-UPDRS Total Score</b>            | 52.95 ±24.51<br>(50.00)<br>(39.50 – 69.50) | 52.58 ±22.45<br>(50.00) (37.00 –<br>58.00) | 1.05 ±15.90 (-6.61;<br>8.71)<br>(1.00, -4.00 – 10.00)  | 0.600   | -0.07       |
| <b>MDS-UPDRS Motor Sum Score II+III</b> | 39.10 ±17.27<br>(40.00)<br>(25.50 – 52.50) | 40.47 ±15.36<br>(37.00) (30.00 –<br>46.00) | 2.47 ±7.88 (-1.33;<br>6.27)<br>(2.00, -2.00 – 8.00)    | 0.211   | -0.31       |
| <b>H&amp;Y</b>                          | 1.95 ±0.22<br>(2.00)<br>(2.00 – 2.00)      | 2.11 ±0.32<br>(2.00)<br>(2.00 – 2.00)      | 0.16 ±0.38 (-0.02;<br>0.34)<br>(0.00, 0.00 – 0.00)     | 0.083   | -0.42       |
| <b>NMSS Domain 1</b>                    | 1.57 ±1.86<br>(1.00)<br>(0.00 – 2.00)      | 1.84 ±2.52<br>(1.00)<br>(0.00 – 4.00)      | 0.63 ±2.75 (-0.70;<br>1.96)<br>(0.00, -1.00 – 2.00)    | 0.502   | -0.23       |
| <b>NMSS Domain 2</b>                    | 7.57 ±7.69<br>(5.00)<br>(2.00 -10.50)      | 7.26 ±7.77<br>(5.00)<br>(2.00 – 8.00)      | 0.16 ±6.36 (-2.91;<br>3.22)<br>(-1.00, -3.00 – 3.00)   | 0.855   | -0.03       |
| <b>NMSS Domain 3</b>                    | 4.52 ±5.03<br>(2.00)<br>(0.00 – 8.00)      | 6.89 ±8.23<br>(4.00)<br>(1.00 – 9.00)      | 2.37 ±7.34 (-1.17;<br>5.91)<br>(0.00, -2.00 – 3.00)    | 0.461   | -0.32       |
| <b>NMSS Domain 4</b>                    | 0.71 ±2.03<br>(0.00)<br>(0.00 – 0.00)      | 0.16 ±0.50<br>(0.00)<br>(0.00 – 0.00)      | -0.63 ±2.01 (-1.60;<br>0.34)<br>(0.00, 0.00 – 0.00)    | 0.180   | 0.32        |
| <b>NMSS Domain 5</b>                    | 3.67 ±6.39<br>(1.00)<br>(0.00 – 5.00)      | 3.68 ±6.08<br>(2.00)<br>(0.00 – 6.00)      | 0.47 ±2.09 (-0.53;<br>1.48)<br>(0.00, 1.00 – 1.00)     | 0.375   | -0.23       |
| <b>NMSS Domain 6</b>                    | 3.76 ±4.01<br>(3.00)<br>(0.00 – 6.00)      | 3.74 ±4.57<br>(2.00)<br>(0.00 – 8.00)      | -0.05 ±3.91 (-1.94;<br>1.83)<br>(0.00, -3.00 – 2.00)   | 0.850   | 0.01        |
| <b>NMSS Domain 7</b>                    | 6.24 ±6.48<br>(4.00)<br>(0.00 – 12.50)     | 6.74 ±5.76<br>(6.00)<br>(2.00 – 13.00)     | 0.47 ±4.06 (-1.48;<br>2.43)<br>(0.00, -2.00 – 4.00)    | 0.598   | -0.12       |
| <b>NMSS Domain 8</b>                    | 0.00 ±0.00<br>(0.00)<br>(0.00 – 0.00)      | 0.42 ±1.12<br>(0.00)<br>(0.00 – 0.00)      | 0.42 ±1.12 (-0.12;<br>0.96)<br>(0.00, 0.00 – 0.00)     | 0.109   | -0.38       |
| <b>NMSS Domain 9</b>                    | 7.57 ±5.60<br>(7.00)<br>(4.00 – 12.00)     | 8.21 ±5.90<br>(8.00)<br>(3.00 – 12.00)     | 1.00 ±4.91 (-1.37;<br>3.37)<br>(1.00, -1.00 – 4.00)    | 0.324   | -0.20       |
| <b>NMSS Total Score</b>                 | 35.62 ±25.69<br>(33.00)<br>(14.00 – 52.00) | 38.95 ±25.82<br>(29.00) (18.00 –<br>62.00) | 4.84 ±18.08 (-3.87;<br>13.55)<br>(2.00, -8.00 – 15.00) | 0.212   | -0.27       |
| <b>KPPS Total Score</b>                 | 6.95 ±8.29<br>(4.00)<br>(0.50 – 12.00)     | 13.42 ±13.60<br>(8.00)<br>(1.00 – 24.00)   | 6.84 ±15.12 (-0.45;<br>14.13)<br>(4.00, -1.00 – 20.00) | 0.073   | -0.45       |
| <b>HADS-A</b>                           | 4.57 ±3.01<br>(4.00)<br>(2.00 – 7.00)      | 4.68 ±3.74<br>(4.00)<br>(2.00 – 9.00)      | 0.16 ±1.50 (-0.57;<br>0.88)<br>(0.00, -1.00 – 2.00)    | 0.560   | -0.11       |

|                 |                                            |                                            |                                                         |       |       |
|-----------------|--------------------------------------------|--------------------------------------------|---------------------------------------------------------|-------|-------|
| <b>HADS-D</b>   | 5.43 ±4.07<br>(5.00)<br>(1.50 – 9.00)      | 4.42 ±3.20<br>(4.00)<br>(2.00 – 7.00)      | -1.00 ±2.08 (-2.00;<br>0.00)<br>(0.00, -3.00 – 0.00)    | 0.044 | 0.48  |
| <b>PDQ-8 SI</b> | 51.94 ±16.64<br>(56.25)<br>(34.38 – 64.06) | 54.11 ±16.44<br>(56.25) (40.63 –<br>68.75) | 2.96 ±9.11 (-1.43;<br>7.35)<br>(3.13, -3.13 – 6.25)     | 0.236 | -0.33 |
| <b>ESS</b>      | 8.14 ±5.79<br>(6.00)<br>(3.50 – 13.00)     | 7.32 ±4.58<br>(7.00)<br>(4.00 – 8.00)      | -0.11 ±2.75 (-1.43;<br>1.22)<br>(0.00, -1.00 – 2.00)    | 0.886 | 0.04  |
| <b>FSS</b>      | 34.62 ±14.71<br>(36.00)<br>(26.00 – 45.50) | 29.89 ±14.35<br>(27.00) (19.00 –<br>39.00) | -4.26 ±10.08 (-9.12;<br>0.60)<br>(-2.00, -10.00 – 0.00) | 0.103 | 0.42  |
| <b>QUIP RS</b>  | 0.48 ±1.12<br>(0.00)<br>(0.00 – 0.00)      | 0.37 ±1.12<br>(0.00)<br>(0.00 – 0.00)      | -0.11 ±1.41 (-0.78;<br>0.57)<br>(0.00, 0.00 – 0.00)     | 0.785 | 0.08  |

Data are given as mean ± standard deviation (95% confidence interval) (median, interquartile range / P25-P75).

Abbreviations: CI, confidence interval; MDS-UPDRS, Movement Disorder Society- Unified Parkinson's Disease Rating Scale; NMSS, Non-Motor Symptoms Scale; CGI-I, Clinical Global Impression – Global Improvement; KPPS, King's PD pain scale; HADS-A/-D, Hospital anxiety and depression scale - Anxiety/ - Depression; PDQ-8 SI, Parkinson's Disease Questionnaire – 8 Summary Index; ESS, Epworth Sleepiness Scale; FSS, Fatigue Severity Scale; QUIP-RS, Questionnaire for Impulsive-Compulsive Disorders in Parkinson's Disease–Rating Scale. Higher score values indicate worse outcome in all scales and questionnaires.

NMSS Domains: Domain 1: Cardiovascular, Domain 2: Sleep/Fatigue, Domain 3: Mood/Apathy, Domain 4: Perceptual problems/Hallucinations, Domain 5: Attention/Memory. Domain 6, Domain 7: Urinary, Domain 8: Sexual dysfunction, Domain 9: Miscellaneous.

For all p-values, significance level was set at  $p \leq 0.05$ . Effect size according to Cohen's D for all variables except for the CGI-I ( $\phi$  coefficient). Cohen's D of 0.2, 0.5, and 0.8 and  $\phi$  coefficient of 0.1, 0.3, and 0.5 were considered 'small', 'medium', and 'large' effect sizes.

**Supplementary Table 4: Differences between the former nabilone and placebo groups in relevant efficacy outcomes**

|                                        | Group assigned from the NMS-Nab1 Study <sup>a</sup> | SCR (n=21)                                | V3 (n=19)                                 | Between-group difference (95% CI) | p-value <sup>b</sup> | Effect size <sup>b</sup> |
|----------------------------------------|-----------------------------------------------------|-------------------------------------------|-------------------------------------------|-----------------------------------|----------------------|--------------------------|
| <b>MDS-UPDRS-I</b>                     | P                                                   | 11.10 ±4.33<br>(10.50)<br>(7.50 – 13.50)  | 8.67 ±5.15<br>(8.00)<br>(4.00 – 12.50)    | 2.36 (-3.88;<br>6.08)             | 0.647                | 0.11                     |
|                                        | N                                                   | 12.91 ±6.96<br>(11.00)<br>(9.00 – 18.00)  | 10.20 ±6.70<br>(10.50)<br>(2.75 – 15.00)  |                                   |                      |                          |
| <b>MDS-UPDRS item 1.7 <sup>c</sup></b> | P                                                   | 2.50 ±0.97<br>(2.00)<br>(2.00 – 3.25)     | 0.78 ±0.83<br>(1.00)<br>(0.00 – 1.50)     | -0.47 (-1.96;<br>1.03)            | 0.514                | 0.18                     |
|                                        | N                                                   | 2.55 ±1.13<br>(2.00)<br>(2.00 – 4.00)     | 1.40 ±1.35<br>(1.00)<br>(0.00 – 2.25)     |                                   |                      |                          |
| <b>MDS-UPDRS item 1.9 <sup>c</sup></b> | P                                                   | 2.30 ±0.48<br>(2.00)<br>(2.00 – 3.00)     | 1.67 ±0.71<br>(2.00)<br>(1.00 – 2.00)     | 0.13 (-0.85;<br>1.12)             | 0.779                | 0.07                     |
|                                        | N                                                   | 2.09 ±0.70<br>(2.00)<br>(2.00 – 3.00)     | 1.30 ±1.34<br>(1.00)<br>(0.00 – 2.25)     |                                   |                      |                          |
| <b>NMSS Domain 2 <sup>c</sup></b>      | P                                                   | 16.40 v12.31<br>(13.50)<br>(6.00 – 24.50) | 5.44 ±5.64<br>(5.00)<br>(1.00 -8.00)      | -4.36 (5.35; -<br>15.64)          | 0.427                | 0.19                     |
|                                        | N                                                   | 14.64 ±12.00<br>(12.00)<br>(6.00 – 20.00) | 8.90 ±9.28<br>(5.00)<br>(2.75 – 15.75)    |                                   |                      |                          |
| <b>KPPS Total Score</b>                | P                                                   | 20.00 ±14.33<br>(16.00)<br>(9.75 – 29.25) | 14.67 ±12.24<br>(16.00)<br>(3.50 – 24.00) | 3.17 (-11.34;<br>17.67)           | 0.651                | 0.11                     |
|                                        | N                                                   | 21.64 ±13.68<br>(17.00)<br>(9.00 -32.00)  | 12.30 ±15.28<br>(8.00)<br>(0.75 – 17.50)  |                                   |                      |                          |

Data of continuous variables are presented as mean ± standard deviation (median, P25-P75) or mean (95% CI).

Abbreviations: CI, confidence interval; MDS-UPDRS, Movement Disorder Society- Unified Parkinson's Disease Rating Scale; NMSS, Non-Motor Symptoms Scale; KPPS, King's Parkinson's Disease pain scale; SCR, screening; V, visit.

Higher Score values indicate worse outcome in all scales and questionnaires.

<sup>a</sup> This column refers to the randomized double-blind group assignment in the previous NMS-Nab1 study. N refers to former nabilone-group and P to the placebo-group. 11 patients at SCR and 10 patients at V3 were in the former nabilone group. 10 patients at SCR and 9 patients at V3 were in the former placebo group.

For all p-values, significance level was set at p≤0.05. Student's t-test. <sup>b</sup> refers to the difference between the former nabilone and placebo group. Effect size according to Cohen's D. Cohen's D of 0.2, 0.5, and 0.8 were considered 'small', 'medium', and 'large' effect sizes.

<sup>c</sup> MDS-UPDRS-1.7: Nighttime sleep problems, 1.9: Pain and other sensations; NMSS Domain 2: Sleep/Fatigue.
